# Supplementary material for: Comparative Proteomic Analysis Reveals Proteins Putatively Involved in Toxin Biosynthesis in the Marine Dinoflagellate Alexandrium catenella
Source: MDPI journal article supplement (doi:10.3390/md11010213), 2013-01-22
Supplement: s1 [file s1]

# Supplementary Figure

**Figure S1.** Interpretation of protein interaction network on nine proteins putatively involved in toxin biosynthesis in *A. catenella* (<http://stitch.embl.de>; organism: *Arabidopsis thaliana*). Stronger interactions are represented by bold lines. Protein-protein interactions are shown in blue, chemical-protein interactions in green and chemical-chemical interactions in red.

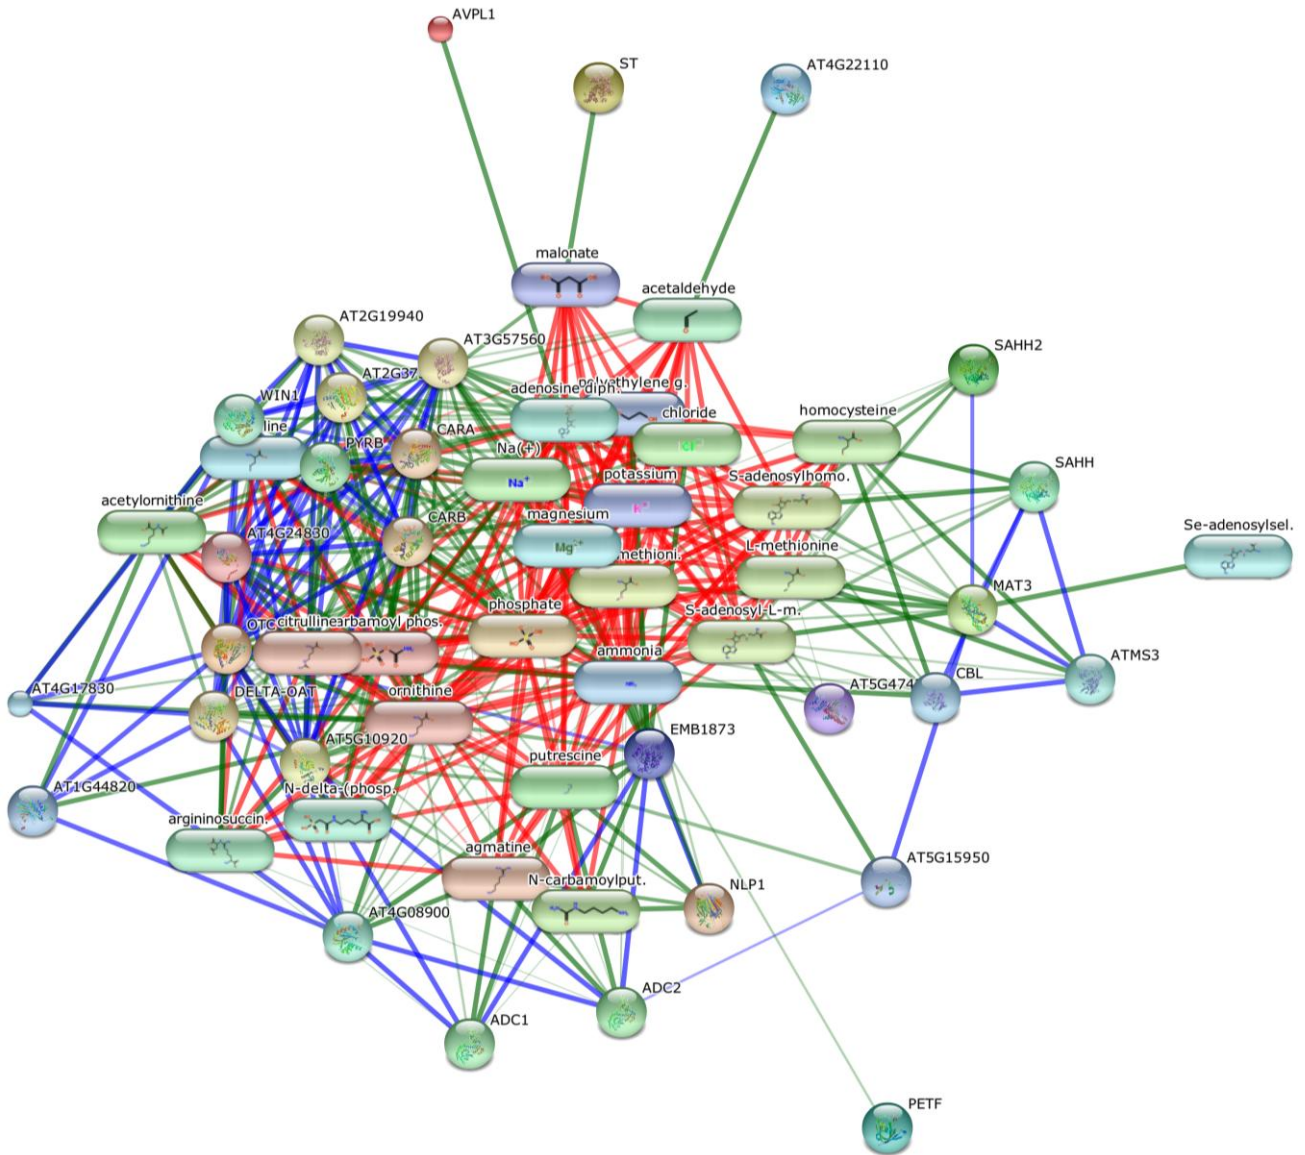

## 9 Proteins We Input

- **AVPL1** vacuolar-type H<sup>+</sup>-translocating inorganic pyrophosphatase, putative; vacuolar-type H<sup>+</sup>-translocating inorganic pyrophosphatase, putative; FUNCTIONS IN- inorganic diphosphatase activity, hydrogen-translocating pyrophosphatase activity; INVOLVED IN- proton transport; LOCATED IN- vacuole; EXPRESSED IN- 22 plant structures; EXPRESSED DURING- 13 growth stages; CONTAINS InterPro DOMAIN/s- Inorganic H<sup>+</sup> pyrophosphatase (InterPro-IPR004131); BEST Arabidopsis thaliana protein match is- AVP2 (ARABIDOPSIS VACUOLAR H<sup>+</sup>-PYROPHOSPHATASE 2); hydrogen-translocating pyrophosphatase (TAIR-AT1G78920.2); Has [...] (802 aa)

- OTC OTC (ORNITHINE CARBAMOYLTRANSFERASE); amino acid binding/carboxyl- or carbamoyltransferase/ornithine carbamoyltransferase; ORNITHINE CARBAMOYLTRANSFERASE (OTC); FUNCTIONS IN- amino acid binding, ornithine carbamoyltransferase activity, carboxyl- or carbamoyltransferase activity; INVOLVED IN- amino acid metabolic process; LOCATED IN- chloroplast, chloroplast stroma; EXPRESSED IN- 23 plant structures; EXPRESSED DURING- 13 growth stages; CONTAINS InterPro DOMAIN/s- Aspartate/ornithine carbamoyltransferase, carbamoyl-*P* binding (InterPro-IPR006132), Aspartate/ornithine carbamoyltransferase [...] (375 aa)
- ST ST; brassinosteroid sulfotransferase/sulfotransferase; Encodes a brassinosteroid sulfotransferase. *In vitro* experiments show that this enzyme has a preference for 24-epibrassinosteroids, particularly 24-epicathasterone, but does not act on castasterone and brassinolide. It is differentially expressed during development, being more abundant in young seedlings and actively growing cell cultures. Expression is induced in response to salicylic acid and methyl jasmonate and bacterial pathogens. (326 aa)
- MAT3 MAT3 (methionine adenosyltransferase 3); copper ion binding/methionine adenosyltransferase; methionine adenosyltransferase 3 (MAT3); FUNCTIONS IN- copper ion binding, methionine adenosyltransferase activity; INVOLVED IN- one-carbon compound metabolic process, *S*-adenosylmethionine biosynthetic process; LOCATED IN- plasma membrane; EXPRESSED IN- 27 plant structures; EXPRESSED DURING- 16 growth stages; CONTAINS InterPro DOMAIN/s- *S*-adenosylmethionine synthetase (InterPro-IPR002133); BEST Arabidopsis thaliana protein match is- MTO3 (METHIONINE OVER-ACCUMULATOR 3); methionine adenosyltran [...] (390 aa)
- SAHH2 SAHH2 (*S*-ADENOSYL-L-HOMOCYSTEINE (SAH) HYDROLASE 2); adenosylhomocysteinase/binding/catalytic; *S*-ADENOSYL-L-HOMOCYSTEINE (SAH) HYDROLASE 2 (SAHH2); FUNCTIONS IN- adenosylhomocysteinase activity, binding, catalytic activity; INVOLVED IN- one-carbon compound metabolic process, metabolic process; LOCATED IN- plasma membrane, vacuole, membrane; EXPRESSED IN- 32 plant structures; EXPRESSED DURING- 15 growth stages; CONTAINS InterPro DOMAIN/s- *S*-adenosyl-L-homocysteine hydrolase (InterPro-IPR000043), NAD(P)-binding (InterPro-IPR016040), *S*-adenosyl-L-homocysteine hydrolase, NAD binding (In [...]) (485 aa)
- SAHH MEE58 (MATERNAL EFFECT EMBRYO ARREST 58); adenosylhomocysteinase; Encodes a *S*-adenosyl-L-homocysteine hydrolase required for DNA methylation-dependent gene silencing.; Adenosylhomocysteine is a competitive inhibitor of *S*-adenosyl-L-methionine-dependent methyl transferase reactions; therefore adenosylhomocysteinase may play a key role in the control of methylations via regulation of the intracellular concentration of adenosylhomocysteine. Required for DNA methylation-dependent gene silencing (485 aa)
- PETF ferredoxin family protein; ferredoxin family protein; FUNCTIONS IN- electron carrier activity, iron-sulfur cluster binding, 2 iron, 2 sulfur cluster binding; INVOLVED IN- electron transport chain; LOCATED IN- chloroplast; EXPRESSED IN- 23 plant structures; EXPRESSED DURING- 13 growth stages;

CONTAINS InterPro DOMAIN/s- Ferredoxin (InterPro-IPR001041), Ferredoxin [2Fe-2S], plant (InterPro-IPR010241), Beta-grasp fold, ferredoxin-type (InterPro-IPR012675); BEST Arabidopsis thaliana protein match is- ATFD3 (ferredoxin 3); 2 iron, 2 sulfur cluster binding/electron carrier/iron-sulfur clu [...] (154 aa)

- AT4G22110 alcohol dehydrogenase, putative; alcohol dehydrogenase, putative; FUNCTIONS IN- oxidoreductase activity, binding, zinc ion binding, catalytic activity; INVOLVED IN- oxidation reduction, metabolic process; LOCATED IN- cellular\_component unknown; EXPRESSED IN- root; CONTAINS InterPro DOMAIN/s- GroES-like (InterPro-IPR011032), NAD(P)-binding (InterPro-IPR016040), Alcohol dehydrogenase GroES-like (InterPro-IPR013154), Alcohol dehydrogenase, zinc-containing, conserved site (InterPro-IPR002328), Alcohol dehydrogenase, zinc-binding (InterPro-IPR013149), Alcohol dehydrogenase superfamily, zinc [...] (389 aa)
- EMB1873 EMB1873 (EMBRYO DEFECTIVE 1873); agmatine deiminase; EMBRYO DEFECTIVE 1873 (EMB1873); FUNCTIONS IN- agmatine deiminase activity; INVOLVED IN- embryonic development ending in seed dormancy, polyamine biosynthetic process; LOCATED IN- cellular\_component unknown; EXPRESSED IN- 22 plant structures; EXPRESSED DURING- 13 growth stages; CONTAINS InterPro DOMAIN/s- Agmatine deiminase (InterPro-IPR017754), Peptidyl-arginine deiminase, Porphyromonas-type (InterPro-IPR007466); Has 1681 Blast hits to 1679 proteins in 426 species—Archae-10; Bacteria-903; Metazoa-6; Fungi-22; Plants-28; V [...] (383 aa)

### Predicted Functional Partners

| NAME              | DESCRIPTION                                                                                                         | score |
|-------------------|---------------------------------------------------------------------------------------------------------------------|-------|
| ● AT4G24830       | arginosuccinate synthase family; arginosuccinate synthase family; FUNCTIONS IN- argininosuccina [...] (494 aa)      | 0.999 |
| ● carbamoyl phos. | carbamoyl phosphate; Carbamoyl phosphate is an anion of biochemical significance. In land-dwell [...] (141.0 g/mol) | 0.999 |
| ● ornithine       | Ornithine is an amino acid that plays a role in the urea cycle. (132.2 g/mol)                                       | 0.998 |
| ● citrulline      | The organic compound citrulline is an -amino acid. Its name is derived from citrullus, the Lati [...] (175.2 g/mol) | 0.997 |
| ● agmatine        | Decarboxylated arginine, isolated from several plant and animal sources, e.g., pollen, ergot, h [...] (130.2 g/mol) | 0.996 |
| ● NLP1            | NLP1 (NITRILASE-LIKE PROTEIN 1); N-carbamoylputrescine amidase/hydrolase, acting on carbon-nit [...] (326 aa)       | 0.996 |
| ● CARA            | CARA (CARBAMOYL PHOSPHATE SYNTHETASE A); carbamoyl-phosphate synthase (glutamine-hydrolyzing)/[...] (430 aa)        | 0.993 |
| ● CARB            | CARB (CARBAMOYL PHOSPHATE SYNTHETASE B); ATP binding/carbamoyl-phosphate synthase/catalytic; [...] (1187 aa)        | 0.992 |

|                         |                                                                                                                                                          |       |
|-------------------------|----------------------------------------------------------------------------------------------------------------------------------------------------------|-------|
| phosphate               | A phosphate, an inorganic chemical, is a salt of phosphoric acid. In organic chemistry, a phospho [...] (97.0 g/mol)                                     | 0.991 |
| DELTA-OAT               | delta-OAT; ornithine-oxo-acid transaminase; ornithine delta-aminotransferase (475 aa)                                                                    | 0.988 |
| AT3G57560               | aspartate/glutamate/uridylate kinase family protein; encodes a <i>N</i> -acetylglutamate kinase, involv [...] (347 aa)                                   | 0.983 |
| AT2G37500               | arginine biosynthesis protein ArgJ family; arginine biosynthesis protein ArgJ family; FUNCTIONS [...] (468 aa)                                           | 0.982 |
| AT5G10920               | argininosuccinate lyase, putative/arginosuccinase, putative; argininosuccinate lyase, putativ [...] (517 aa)                                             | 0.981 |
| AT2G19940               | <i>N</i> -acetyl-gamma-glutamyl-phosphate reductase/NAD or NADH binding/binding/catalytic/oxidore [...] (401 aa)                                         | 0.979 |
| selenomethioni.         | selenomethionine; A selenium (Se) analogue of methionine in which sulfur is replaced with the t [...] (196.1 g/mol)                                      | 0.979 |
| S-adenosylhomo.         | <i>S</i> -adenosylhomocysteine; <i>S</i> -Adenosyl-L-homocysteine (SAH) is an amino acid derivative used in sev [...] (384.4 g/mol)                      | 0.978 |
| S-adenosyl-L-m.         | <i>S</i> -adenosyl-L-methionine; <i>S</i> -Adenosyl methionine (SAM, SAME, SAM-e) is a common co-substrate invo [...] (399.4 g/mol)                      | 0.977 |
| L-methionine            | A synthetic amino acid radiolabeled with carbon-11. Acting as a methyl donor, methionine C 11 i [...] (149.2 g/mol)                                      | 0.973 |
| <i>N</i> -carbamoylput. | <i>N</i> -carbamoylputrescine (131.2 g/mol)                                                                                                              | 0.971 |
| homocysteine            | A thiol-containing amino acid formed by a demethylation of methionine. (135.2 g/mol)                                                                     | 0.966 |
| chloride                | The chloride ion is formed when the element chlorine, a halogen, picks up one electron to form [...] (35.5 g/mol)                                        | 0.965 |
| Na(+)                   | Sodium hydride is the chemical compound with the empirical formula NaH. It is primarily used as [...] (23.0 g/mol)                                       | 0.965 |
| acetylornithine         | acetylornithine (174.2 g/mol)                                                                                                                            | 0.962 |
| putrescine              | Putrescine (sometimes spelled putrescin) is a foul-smelling organic chemical compound NH <sub>2</sub> (CH <sub>2</sub> ) <sub>4</sub> [...] (88.2 g/mol) | 0.958 |
| ADC2                    | ADC2 (ARGININE DECARBOXYLASE 2); arginine decarboxylase; encodes a arginine decarboxylase (ADC) [...] (711 aa)                                           | 0.947 |
| ADC1                    | ADC1 (ARGININE DECARBOXYLASE 1); arginine decarboxylase; encodes a arginine decarboxylase (ADC) [...] (702 aa)                                           | 0.945 |
| PYRB                    | aspartate carbamoyltransferase, chloroplast/aspartate transcarbamylase/ATCase (PYRB); encod [...] (390 aa)                                               | 0.942 |
| acetaldehyde            | Acetaldehyde (systematically ethanal) is an organic chemical compound with the formula CH <sub>3</sub> CHO o [...] (44.1 g/mol)                          | 0.941 |
| argininosuccin.         | argininosuccinate (290.3 g/mol)                                                                                                                          | 0.941 |
| WIN1                    | WIN1 (HOPW1-1-INTERACTING 1); <i>N</i> 2-acetyl-L-ornithine-2-oxoglutarate 5-aminotransferase/catalyti [...] (457 aa)                                    | 0.933 |
| <i>N</i> -delta-(phosp. | <i>N</i> -delta-(phosphonoacetyl)-L-ornithine (254.2 g/mol)                                                                                              | 0.930 |

|                 |                                                                                                                                 |       |
|-----------------|---------------------------------------------------------------------------------------------------------------------------------|-------|
| AT4G08900       | arginase; Encodes an arginase, likely to be involved in polyamine biosynthesis in pollen. (342 aa)                              | 0.922 |
| adenosine diph. | adenosine diphosphate; Adenosine diphosphate, abbreviated ADP, is a nucleotide. It is an ester [...] (427.2 g/mol)              | 0.921 |
| ATMS3           | ATMS3 (methionine synthase 3);<br>5-methyltetrahydropteroyltriglutamate-homocysteine S-methyltrans [...] (812 aa)               | 0.917 |
| Se-adenosylsel. | Se-adenosylselenomethionine (445.3 g/mol)                                                                                       | 0.911 |
| magnesium       | Magnesium hydride is the chemical compound MgH <sub>2</sub> . It contains 7.66% by weight of hydrogen and ha [...] (24.3 g/mol) | 0.907 |
| norvaline       | Differs from valine in being 1 carbon longer instead of branched. (117.1 g/mol)                                                 | 0.906 |
| AT4G17830       | peptidase M20/M25/M40 family protein; peptidase M20/M25/M40 family protein; FUNCTIONS IN- metal [...] (440 aa)                  | 0.904 |
| CBL             | CBL (cystathionine beta-lyase); cystathionine beta-lyase; Encodes second enzyme in the methioni [...] (464 aa)                  | 0.904 |
| ammonia         | Ammonia is a compound of nitrogen and hydrogen with the formula NH <sub>3</sub> . It is a colourless gas wit [...] (17.0 g/mol) | 0.903 |
| AT1G44820       | aminoacylase, putative/ <i>N</i> -acyl-L-amino-acid amidohydrolase, putative; aminoacylase, putative/[...] (438 aa)             | 0.900 |
| AT5G15950       | adenosylmethionine decarboxylase family protein; adenosylmethionine decarboxylase family protei [...] (362 aa)                  | 0.900 |
| polyethylene g. | polyethylene glycol; Ethylene glycol (IUPAC name: ethan-1, 2-diol) is an organic compound widely [...] (62.1 g/mol)             | 0.900 |
| potassium       | An element with atomic symbol K, atomic number 19, and atomic weight 39.10. (39.1 g/mol)                                        | 0.900 |
| malonate        | Malonic acid (IUPAC systematic name: propanedioic acid) is a dicarboxylic acid with structure C [...] (104.1 g/mol)             | 0.900 |
