# Supplementary material for: Comparative Proteomic Analysis Reveals Proteins Putatively Involved in Toxin Biosynthesis in the Marine Dinoflagellate Alexandrium catenella
Source: MDPI journal article supplement (doi:10.3390/md11010213), 2013-01-22
Supplement: s3 [file s3]

marinedrugs-11-00213-s001.mol
  corina  07071423203D 1   1.00000     0.00000 
CORINA 3.49 0023  12.04.2013
 32 34  0  0  0  0  0  0  0  0999 V2000
   -0.0167    1.3799    0.0096 N   0  0  0  0  0  0  0  0  0  0  0  0
    0.0021   -0.0041    0.0020 C   0  0  0  0  0  0  0  0  0  0  0  0
    1.1032   -0.5862    0.5733 N   0  0  0  0  0  0  0  0  0  0  0  0
    2.1756    0.0951    1.2982 C   0  0  0  0  0  0  0  0  0  0  0  0
    2.2075    1.5994    1.0788 C   0  0  0  0  0  0  0  0  0  0  0  0
    1.2597    2.0890    0.0012 C   0  0  0  0  0  0  0  0  0  0  0  0
    2.0216   -0.0771    2.7483 N   0  0  0  0  0  0  0  0  0  0  0  0
    1.9521    1.1667    3.3251 C   0  0  0  0  0  0  0  0  0  0  0  0
    1.7879    2.1532    2.3839 N   0  0  0  0  0  0  0  0  0  0  0  0
    1.4970   -2.0063    0.5394 C   0  0  0  0  0  0  0  0  0  0  0  0
    3.0292   -1.9748    0.3268 C   0  0  0  0  0  0  0  0  0  0  0  0
    3.4744   -0.5822    0.8299 C   0  0  0  0  0  0  0  0  0  0  0  0
    1.9226    1.8972   -1.3643 C   0  0  0  0  0  0  0  0  0  0  0  0
    1.0776    2.4694   -2.3972 O   0  0  0  0  0  0  0  0  0  0  0  0
    1.5200    2.3836   -3.6659 C   0  0  0  0  0  0  0  0  0  0  0  0
    2.5831    1.8454   -3.9035 O   0  0  0  0  0  0  0  0  0  0  0  0
   -0.9654   -0.7082   -0.5148 N   0  3  0  0  0  0  0  0  0  0  0  0
    2.0325    1.3845    4.6077 N   0  3  0  0  0  0  0  0  0  0  0  0
    1.0728    3.1521    0.1533 H   0  0  0  0  0  0  0  0  0  0  0  0
    3.2243    1.9177    0.8488 H   0  0  0  0  0  0  0  0  0  0  0  0
    4.0705    0.1643   -0.2329 O   0  0  0  0  0  0  0  0  0  0  0  0
    4.3883   -0.7152    1.9204 O   0  0  0  0  0  0  0  0  0  0  0  0
    3.6581   -3.0040    1.0930 O   0  0  0  0  0  0  0  0  0  0  0  0
    3.9404   -4.2763    0.3068 S   0  0  0  0  0  0  0  0  0  0  0  0
    4.2316   -5.3159    1.2817 O   0  0  0  0  0  0  0  0  0  0  0  0
    2.7407   -4.5693   -0.4619 O   0  0  0  0  0  0  0  0  0  0  0  0
    5.0824   -3.9955   -0.5495 O   0  5  0  0  0  0  0  0  0  0  0  0
    0.7836    2.8947   -4.6723 N   0  0  0  0  0  0  0  0  0  0  0  0
    1.3277    2.7892   -6.2328 S   0  0  0  0  0  0  0  0  0  0  0  0
    0.3837    3.5278   -7.0571 O   0  0  0  0  0  0  0  0  0  0  0  0
    2.6547    3.3848   -6.2555 O   0  0  0  0  0  0  0  0  0  0  0  0
    1.3583    1.3749   -6.5717 O   0  5  0  0  0  0  0  0  0  0  0  0
  1  2  1  0      
  2  3  1  0      
  3  4  1  0      
  4  5  1  0      
  5  6  1  0      
  6  1  1  0      
  4  7  1  0      
  7  8  1  0      
  8  9  1  0      
  9  5  1  0      
  3 10  1  0      
 10 11  1  0      
 11 12  1  0      
 12  4  1  0      
  6 13  1  0      
 13 14  1  0      
 14 15  1  0      
 15 16  2  0      
  2 17  2  0      
  8 18  2  0      
  6 19  1  0      
  5 20  1  0      
 12 21  1  0      
 12 22  1  0      
 11 23  1  4      
 23 24  1  0      
 24 25  2  0      
 24 26  2  0      
 24 27  1  0      
 15 28  1  0      
 28 29  1  0      
 29 30  2  0      
 29 31  2  0      
 29 32  1  0      
M  CHG  4  17   1  18   1  27  -1  32  -1
M  STY  1   1 SUP
M  SLB  1   1   1
M  SAL   1  5  23  24  25  26  27
M  SBL   1  1  25
M  SMT   1 OSO3-
M  SBV   1 25   -6.8534    4.3969
M  STY  1   2 SUP
M  SLB  1   2   2
M  SAL   2  5  28  29  30  31  32
M  SBL   2  1  30
M  SMT   2 NHSO3-
M  SBV   2 30   -7.6061    6.6968
M  END
$$$$
