# Supplementary material for: Comparative Proteomic Analysis Reveals Proteins Putatively Involved in Toxin Biosynthesis in the Marine Dinoflagellate Alexandrium catenella
Source: MDPI journal article supplement (doi:10.3390/md11010213), 2013-01-22
Supplement: s4 [file s4]

marinedrugs-11-00213-s001.mol
  ChemDraw06021422422D

 32 34  0  0  0  0  0  0  0  0999 V2000
   -0.6347    0.5299    0.0000 N   0  0  0  0  0  0  0  0  0  0  0  0
   -0.6347   -0.2951    0.0000 C   0  0  0  0  0  0  0  0  0  0  0  0
    0.0798   -0.7076    0.0000 N   0  0  0  0  0  0  0  0  0  0  0  0
    0.7943   -0.2951    0.0000 C   0  0  0  0  0  0  0  0  0  0  0  0
    0.7943    0.5299    0.0000 C   0  0  0  0  0  0  0  0  0  0  0  0
    0.0798    0.9424    0.0000 C   0  0  0  0  0  0  0  0  0  0  0  0
    1.5789   -0.5500    0.0000 N   0  0  0  0  0  0  0  0  0  0  0  0
    2.0638    0.1174    0.0000 C   0  0  0  0  0  0  0  0  0  0  0  0
    1.5789    0.7848    0.0000 N   0  0  0  0  0  0  0  0  0  0  0  0
    0.2513   -1.5146    0.0000 C   0  0  0  0  0  0  0  0  0  0  0  0
    1.0718   -1.6008    0.0000 C   0  0  0  0  0  0  0  0  0  0  0  0
    1.4074   -0.8471    0.0000 C   0  0  0  0  0  0  0  0  0  0  0  0
    0.0798    1.7674    0.0000 C   0  0  0  0  0  0  0  0  0  0  0  0
   -0.6347    2.1799    0.0000 O   0  0  0  0  0  0  0  0  0  0  0  0
   -1.3491    1.7674    0.0000 C   0  0  0  0  0  0  0  0  0  0  0  0
   -1.3491    0.9424    0.0000 O   0  0  0  0  0  0  0  0  0  0  0  0
   -1.3491   -0.7076    0.0000 N   0  3  0  0  0  0  0  0  0  0  0  0
    2.8888    0.1174    0.0000 N   0  3  0  0  0  0  0  0  0  0  0  0
    0.4923    1.6569    0.0000 H   0  0  0  0  0  0  0  0  0  0  0  0
    0.7943    1.3549    0.0000 H   0  0  0  0  0  0  0  0  0  0  0  0
    2.1218   -1.2596    0.0000 O   0  0  0  0  0  0  0  0  0  0  0  0
    0.5824   -0.8471    0.0000 O   0  0  0  0  0  0  0  0  0  0  0  0
    1.1099   -2.2507    0.0000 O   0  0  0  0  0  0  0  0  0  0  0  0
    1.6933   -2.8340    0.0000 S   0  0  0  0  0  0  0  0  0  0  0  0
    2.2766   -2.2507    0.0000 O   0  0  0  0  0  0  0  0  0  0  0  0
    1.1099   -3.4174    0.0000 O   0  0  0  0  0  0  0  0  0  0  0  0
    2.2766   -3.4174    0.0000 O   0  5  0  0  0  0  0  0  0  0  0  0
   -2.0638    3.4174    0.0000 N   0  0  0  0  0  0  0  0  0  0  0  0
   -2.0638    2.5924    0.0000 S   0  0  0  0  0  0  0  0  0  0  0  0
   -1.2388    2.5924    0.0000 O   0  0  0  0  0  0  0  0  0  0  0  0
   -2.8888    2.5924    0.0000 O   0  0  0  0  0  0  0  0  0  0  0  0
   -2.0638    1.7674    0.0000 O   0  5  0  0  0  0  0  0  0  0  0  0
  1  2  1  0      
  2  3  1  0      
  3  4  1  0      
  4  5  1  0      
  5  6  1  0      
  6  1  1  0      
  4  7  1  0      
  7  8  1  0      
  8  9  1  0      
  9  5  1  0      
  3 10  1  0      
 10 11  1  0      
 11 12  1  0      
 12  4  1  0      
  6 13  1  0      
 13 14  1  0      
 14 15  1  0      
 15 16  2  0      
  2 17  2  0      
  8 18  2  0      
  6 19  1  0      
  5 20  1  0      
 12 21  1  6      
 12 22  1  1      
 11 23  1  4      
 23 24  1  0      
 24 25  2  0      
 24 26  2  0      
 24 27  1  0      
 15 28  1  0      
 28 29  1  0      
 29 30  2  0      
 29 31  2  0      
 29 32  1  0      
M  CHG  4  17   1  18   1  27  -1  32  -1
M  STY  1   1 SUP
M  SLB  1   1   1
M  SAL   1  5  23  24  25  26  27
M  SBL   1  1  25
M  SMT   1 OSO3-
M  SBV   1 25   -6.8534    4.3969
M  STY  1   2 SUP
M  SLB  1   2   2
M  SAL   2  5  28  29  30  31  32
M  SBL   2  1  30
M  SMT   2 NHSO3-
M  SBV   2 30   -7.6061    6.6968
M  END
