# Supplementary material for: Comparative Proteomic Analysis Reveals Proteins Putatively Involved in Toxin Biosynthesis in the Marine Dinoflagellate Alexandrium catenella
Source: Mar Drugs. 2013 Jan 22;11(1):213–32. doi: 10.3390/md11010213 (PMC3564168; doi:10.3390/md11010213)
Supplement: Supplementary File 2 — Supplementary Table (XLS, 67 KB) [file marinedrugs-11-00213-s002.xls]

## Sheet: Sheet1
Supplemental Table S1. Identification of differentially expressed proteins of A. catenella CI01 at different toxin biosynthesis stages.
Spot ID a.	NCBI b	Protein name	Theoretical pI	Theoretical MW	No. of matched peptides	Sequence Coverage (%)	Protein score	Protein score C.I.%	Function	T28 vs T24		T34 vs T24
										Fold change c	P-Value	Fold change	P-Value
Protein modification
1	26991410	chaperone protein DnaK	4.83	68.87	10	38	88	98.32	protein folding; response to stress	0.46	0.031	1.2	0.102
3	215400773	Hsp70-type chaperone	5.04	68.81	8	45	137	100	Heat shock protein 70 family; protein folding	0.76	0.839	2.67	0.006
7	148549568	Chaperonin GroEL	4.97	56.75	13	51	334	100	Protein and ATP binding	0.32	0.021	1.34	0.518
12	148549568		4.97	56.75	23	89	730	100		2.2	0.002	1.5	0.106
Metabolism
8	170723674	serine hydroxymethyltransferase	5.85	45.18	6	80	101	99.91	L-serine,glycine,one-carbon metabolic process	0.44	0.015	0.83	0.572
42	70732651		5.74	45.15	5	46	93	99.49		0.35	0.002	0.62	0.023
15	35210480	glyceraldehyde-3-phosphate dehydrogenase	4.81	26.21	1	63	248	95.24	Glucose metabolic process;oxidation reduction	1.2	0.621	2.06	0.003
16	35210480		4.81	26.21	1	77	248	100		2.21	0.093	3.67	0.003
17	35210480		4.81	26.21	1	31	101	100		0.3	0.241	2.45	0.018
83	35210480		4.81	26.21	1	89	248	100		0.49	0.015	0.25	0.002
19	58613475	phosphoglycerate kinase	6.16	27.32	1	48	271	100	Glycolysis	2.19	0.074	3.47	0.003
37	58613.5	Chloroplast ferredoxin-NADP+ reductase	4.78	28.67	2	90	389	100	ferredoxin-NADP reductase type 1 family;Oxidation reduction	0.13	0.007	1.19	0.641
40	170723385	ornithine carbamoyltransferase	5.92	38.1	15	68	296	100	Cellular amino acid metabolic process	0.45	0.088	1.61	0.003
31	46909371	Methionine (S-) adenosyltransferase	5.81	34.39	4	29	145	100	Transferase; one-carbon metabolic	1.26	0.45	0.4	0.043
32	158524698		5.59	35.3	3	73	149	100		1.89	0.173	0.47	0.033
33	71370920		6.82	35.08	3	77	202	100		1.15	0.767	0.4	0.034
34	225685869		5.54	45.52	3	90	121	100		0.92	0.942	0.46	0.042
36	225685865		5.73	51.08	4	93	92	99.248		2.5	0.007	0.18	0.091
41	104782658	succinyl-CoA synthetase subunit beta	5.83	41.47	3	39	92	99.27	Tricarboxylic acid cycle	0.32	0.024	1.55	0.058
45	134037072	plastid oxygen-evolving enhancer 1–2 precursor	5.37	27.84	1	95	333	97.61	Photosynthesis; photosystemⅡ stabilization	0.38	0.198	1.24	0.801
47	118577178	Chorismatemutase/prephenatedehydratas	6.6	25.75	7	70	85	96.79	L-phenylalanine biosynthetic process	0.48	0.135	3.11	<0.001
49	149071995	photosystem I assembly protein ycf1	9.79	26.39	2	85	80	100	photosynthesis	0.1	0.205	3.63	0.002
52	170723490	nucleoside-diphosphate kinase	5.23	15	7	85	298	100	CTP,GTP,UTP biosynthetic process	0.55	0.845	2.52	0.125
54	56693619	protein kinase C conserved region 2	8.7	23.29	2	64	64.3	99.98	Transferase;kinase activity	0.92	0.995	2.12	0.073
55	26987276	inorganic pyrophosphatase	4.77	19.18	2	82	87	97.73	Phosphate metabolic process	1	1	11.55	0.003
56	3355306	light-harvesting polyprotein precursor	5.26	22.37	2	98	1671	100	Photosynthesis,light harvesting	0.46	0.008	0.54	0.018
67	219114000	fructose-bisphosphate aldolase	9.71	27.23	1	90	185	100	Glycolysis	2.18	<0.001	1.06	0.947
69	71000213	enolase 2	5.07	40.57	7	20	205	100	glycolysis	2.88	0.006	0.8	0.923
78	148546281	arginine deiminase	5.66	46.73	18	71	660	100	arginine catabolic process; Inhibits Cell Proliferation; Arresting Cell Cycle and Inducing Apoptosis	3.3	<0.001	0.2	0.008
60	75284311	ribulose 1,5-bisphosphate carboxylase, chloroplastic;	7.01	28.88	2	95	476	99.99	Oxidation reduction; photorespiration; reductive pentose-phosphate cycle	0.46	0.072	0.87	0.861
68	75284311		7.01	28.88	2	94	476	99.99		2.14	0.005	1.02	1
75	37730371		6.26	60.21	6	94	95	99.64		2.52	0.008	0.81	0.903
71	75284311		7.01	28.89	1	97	476	99.43		8.11	0.001	1.08	1
70	37731771	ribulose 1,5-bisphosphate carboxylase oxygenase form II (small subunit)	6.09	34.03	5	95	144	100	Oxidation reduction; photorespiration; reductive pentose-phosphate cycle	0.37	0.298	2.21	0.037
72	33317821	ribulose 1,5-bisphosphate carboxylase oxygenase large subunit	5.66	50.47	5	95	89	98.57	Oxidation reduction; photorespiration; reductive pentose-phosphate cycle	3.05	0.022	1.32	0.901
73	33317821		5.66	50.47	4	93	135	100		2.96	0.048	1.13	0.996
74	33317821		5.66	50.47	4	95	135	100		3.36	0.11	1.07	1
76	211939908	adenosylhomocysteinase (AdoHcy)	5.74	27.97	8	79	150	100	one-carbon metabolic process; an enzyme that converts SAH to homocysteine and adenosine	2.2	0.003	0.49	0.117
79	211939908		5.74	27.97	7	83	116	99.99		3.32	0.003	0.88	0.985
77	211939908	S-adenosylhomocysteinase (SAH)	5.74	27.97	9	89	120	99.99	one-carbon metabolic process; an intermediate in the synthesis of cysteine and formed by the demethylation of SAM	2.89	0.001	0.86	0.905
82	257480821	plastid protein NAP50	5.72	51.89	6	91	111	100	Nitrogen-associated protein 50.	0.99	1	2.2	0.011
88	257480821		5.72	51.89	7	75	138	100		1.1	0.991	2.26	0.051
89	257480821		5.72	51.89	7	75	90	98.91		2.02	0.073	1.33	0.735
93	27450755	chlorophyll A–C binding protein	5.26	22.37	2	69	183	100	photosynthesis	0.39	0.102	1.78	0.041
94	115901552	similar to sulfotransferase (SULT)	4.7	35.22	1	88	122	96.24	sulfotransferase activity	0.44	0.043	1.24	0.459
Cell cycle regulation
9	163750818	Cell division protein FtsH	4.89	71.9	10	64	135	100	Cell division; proteolysis	3.43	0.058	0.79	0.99
38	169831563	formamidopyrimidine-DNA glycosylase	9.73	31.35	7	83	77	95.44	DNA damage ;DNA repair ;base-excision repair	0.37	0.628	4.42	0.003
39	169831563		8.7	34.35	7	57	77	95.44		0.48	0.963	5.22	0.039
62	134037078	DNA damage checkpoint protein rad24	5	26.53	8	33	158	100	Protein domain specific binding	0.3	0.005	0.97	0.993
64	134037086	DNA damage checkpoint protein rad17	4.96	27.33	9	17	168	100	14-3-3 family; Protein domain specific binding	0.38	0.136	1.63	0.13
Oxidative stress response
10	112253644	heat shock protein 70	5.1	70.14	21	91	492	100	Response to stress	0.82	0.741	2.24	0.002
11	112253644		4.93	28.48	1	35	444	97.85		2.01	0.002	0.53	0.075
14	294873483		7.22	34.64	1	87	55	99.9		0.79	0.984	3.73	0.018
18	294873483		7.22	34.64	2	33	111	100		2.1	0.365	3.43	0.031
53	26987945	DNA-binding stress protein	5.2	17.85	8	19	172	100		0.34	0.626	4.88	0.002
59	118490698	cytochrome c oxidase subunit, putative	5.63	22.69	2	74	198	99.91	Cellcular iron ion homeostasis; oxidation reduction;response to stress	0.19	0.004	0.37	0.014
84	26991362	ketol-acid reductoisomerase	5.48	36.58	3	27	103	99.95	Amino-acid biosynthesis; oxidoreductase	0.39	0.302	1.41	0.583
95	26990544	alcohol dehydrogenase	5.61	35.89	6	68	110	99.99	Oxidation reduction;zinc ion binding	0.45	0.871	7.63	0.001
96	219848105	RNA binding S1 domain protein	5.42	27	1	65	54	100	similar to cold shock protein, Response to stress	0.88	0.928	2.24	0.004
20	166030338	luciferin-binding protein	5.59	75.06	26	95	299	100		0.46	0.393	2.3	0.026
22	166030338		5.59	75.06	28	95	519	100	Specific substrate-binding protein, clock-controlled repressor	2.89	0.003	1.25	0.832
23	166030338		5.59	75.06	21	90	108	99.98		0.46	0.056	0.67	0.578
24	166030338		5.51	29.08	1	55	460	95.04		1.34	0.919	6.22	<0.001
25	166030338		5.59	75.06	12	92	107	99.98		1.02	1	2.03	0.013
26	166030338		5.59	75.06	14	97	165	100		1.36	0.326	2	0.009
27	166030338		5.59	75.06	13	97	96	99.75		0.62	0.097	0.2	0.004
28	166030338		5.59	75.06	16	99	330	100		0.39	0.008	0.82	0.453
29	166030338		6.03	28.81	1	95	640	99.14		0.4	0.02	0.22	0.006
Translation
6	301500981	elongation factor Tu	4.73	26.88	2	99	316	100	Protein biosynthesis; translation elongation factor activity	0.45	0.015	0.79	0.363
91	30468209		9.81	27.69	2	97	141	100		2.89	0.013	2.34	0.058
92	30468209		9.81	27.69	2	95	141	100		0.69	0.084	0.49	0.011
61	26988588	elongation factor P	4.73	21.35	5	99	140	100	Elongation factor P family; Protein biosynthesis	0.49	0.077	1.1	0.921
63	167032445		4.77	21.38	4	95	127	100		0.49	0.027	0.89	0.809
50	167033775	Hcp1 family type VI secretion system effector	5.64	18.59	6	29	340	100	as an extracellular T6SS translocon	0.1	0.379	4.47	0.002
Signal transduction
5	26991228	hypothetical protein PP_4544	4.87	45.27	14	99	437	100	Signal peptide; chain	0.69	0.22	2.92	<0.001
Transport
2	41055863	nuclear pore complex protein Nup155	5.77	26.56	1	99	196	95.2	Nucleocytoplasmic transport	2.07	0.02	2.32	0.007
65	41055863		5.77	26.56	1	97	196	95.58		2.1	0.083	0.97	1
97	41055863		5.77	26.56	3	94	196	97.13		0.44	0.014	1.2	0.405
4	26992088	ATP synthase F1, beta subunit	4.88	49.39	12	89	445	100	ATP synthesis coupled proton transport	0.67	0.933	2.59	0.06
48	222053555		4.89	51	7	95	355	100		0.89	0.963	2.01	0.022
46	156350099	hypothetical protein NEMVEDRAFT_v1g142315	5.77	26.56	1	85	310	95.57	Nucleocytoplasmic transport	0.39	0.007	2.02	<0.001
81	156350099		5.77	26.56	1	95	310	95.39		0.82	0.984	2.04	0.195
58	294929773	UDP-N-acetylglucosamine–dolichyl-phosphate	8.17	28.52	2	43	416	100	transferase	1.12	0.97	2.37	0.012
66	26988814	OmpF family protein	4.72	37.22	2	93	700	100	Membrane; porin activity	0.49	0.075	1.32	0.294
87	26987153	polyamine ABC transporter, periplasmic polyamine-binding protein	5.62	37.89	4	65	118	99.99	Transporter activity	1.15	0.926	2.13	0.005
Protein biosynthesis
85	134037068	Actin	5.26	41.95	8	57	187	100	Protein and ATP binding	0.9	0.998	3.79	0.013
98	86355884	formyltetrahydrofolate deformylase	6.26	32.96	4	41	156	100	de novo' IMP biosynthetic process	0.82	0.929	2.44	0.014
Uncharacterized proteins
13	294955276	hypothetical protein Pmar_PMAR010017	11.15	27.93	1	99	485	95.07	uncharacterized	0.78	0.336	2.1	<0.001
35	294950255	hypothetical protein Pmar_PMAR005244	9.18	25.3	1	66	416	98.9		0.5	0.002	0.05	<0.001
57	294950255		6.03	27.81	1	47	416	97.84		0.64	0.181	0.48	0.053
90	294950255		6.03	27.81	1	68	416	97.71		1.57	0.162	0.48	0.209
Unknown proteins
21			8.89	20.88	2		165	100		0.92	0.977	2.05	0.01
44			10.25	24.23	1		38	96.9		0.44	0.098	1.91	0.014
Unidentified proteins
30										0.18	<0.001	0.36	0.001
43										0.48	0.104	0.82	0.753
51										1.34	0.73	2.63	0.011
80										0.5	0.022	0.72	0.18
86										0.34	0.059	0.72	0.525
99										0.46	0.145	1.1	0.959
100										0.35	0.009	0.78	0.368
101										0.32	0.094	1.35	0.478
102										0.36	0.862	7.44	0.001
a Spot ID represents the protein spot number on the 2-D gels.
b Accession numbers according to the NCBI database.
c Spot abundance is expressed as the average optical density of up-regulated or down-regulated proteins at T24, T28 and T34.
